# Supplementary material for: Evidence for spreading seizure as a cause of theta-alpha activity electrographic pattern in stereo-EEG seizure recordings
Source: PubMed Central journal article supplement (PMC7946361; doi:10.1371/journal.pcbi.1008731), 2021-02-26

**A**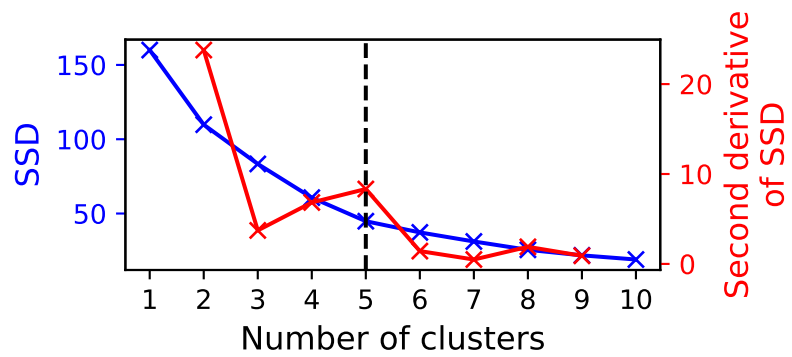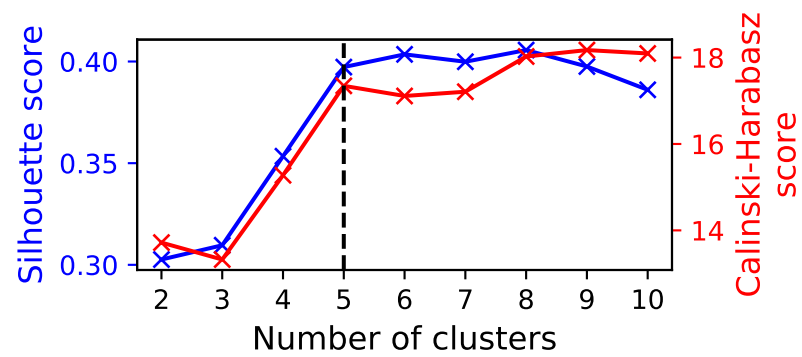**C**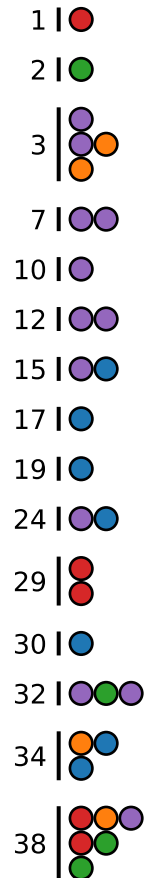**B**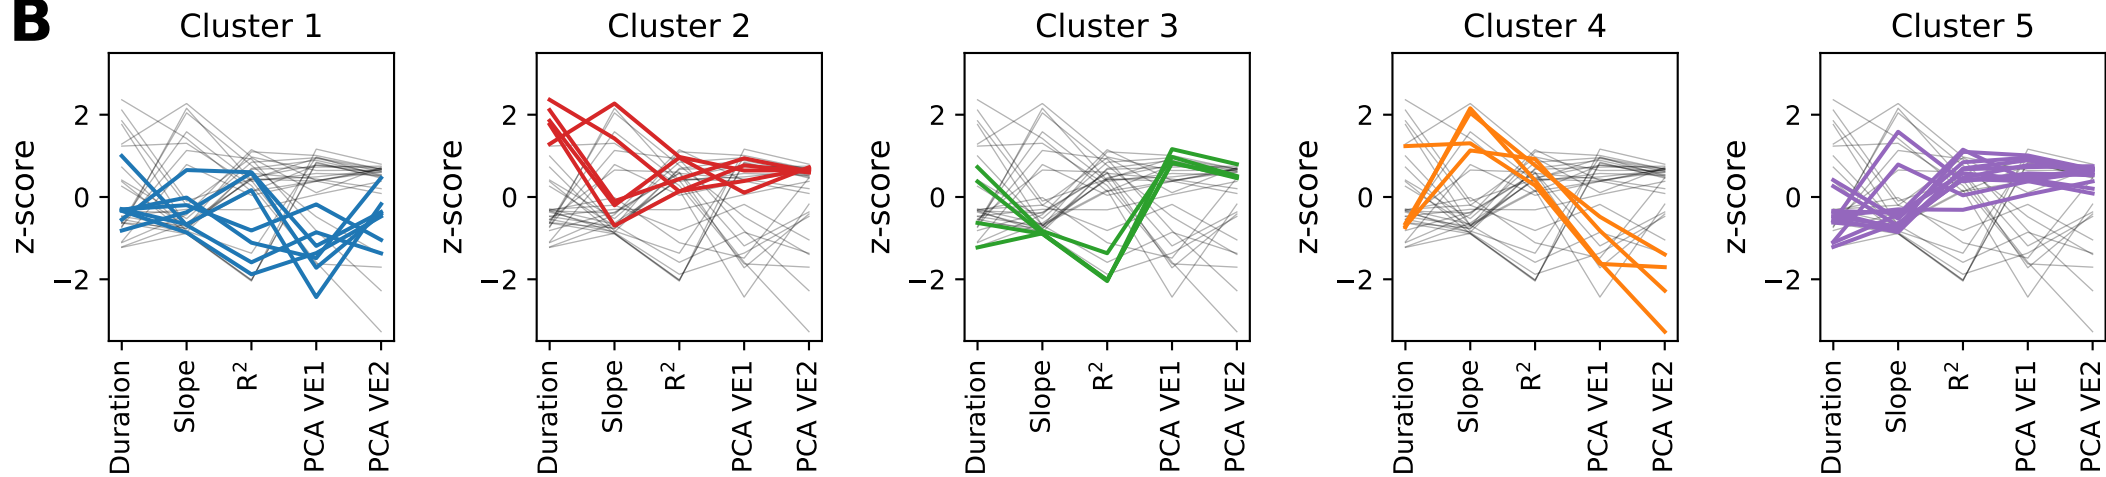

Supplement: pcbi.1008731.s004.pdf [file pcbi.1008731.s004.pdf]
